# Supplementary material for: Immune and metabolic effects of African heritage diets versus Western diets in men: a randomized controlled trial
Source: Springer Nature journal article supplement (doi:10.1038/s41591-025-03602-0), 2025-04-03
Supplement: MOESM1 [file 41591_2025_3602_MOESM1_ESM.pdf]

# **Immune and metabolic effects of African heritage diets versus Western diets in men: a randomized controlled trial**

---

In the format provided by the  
authors and unedited

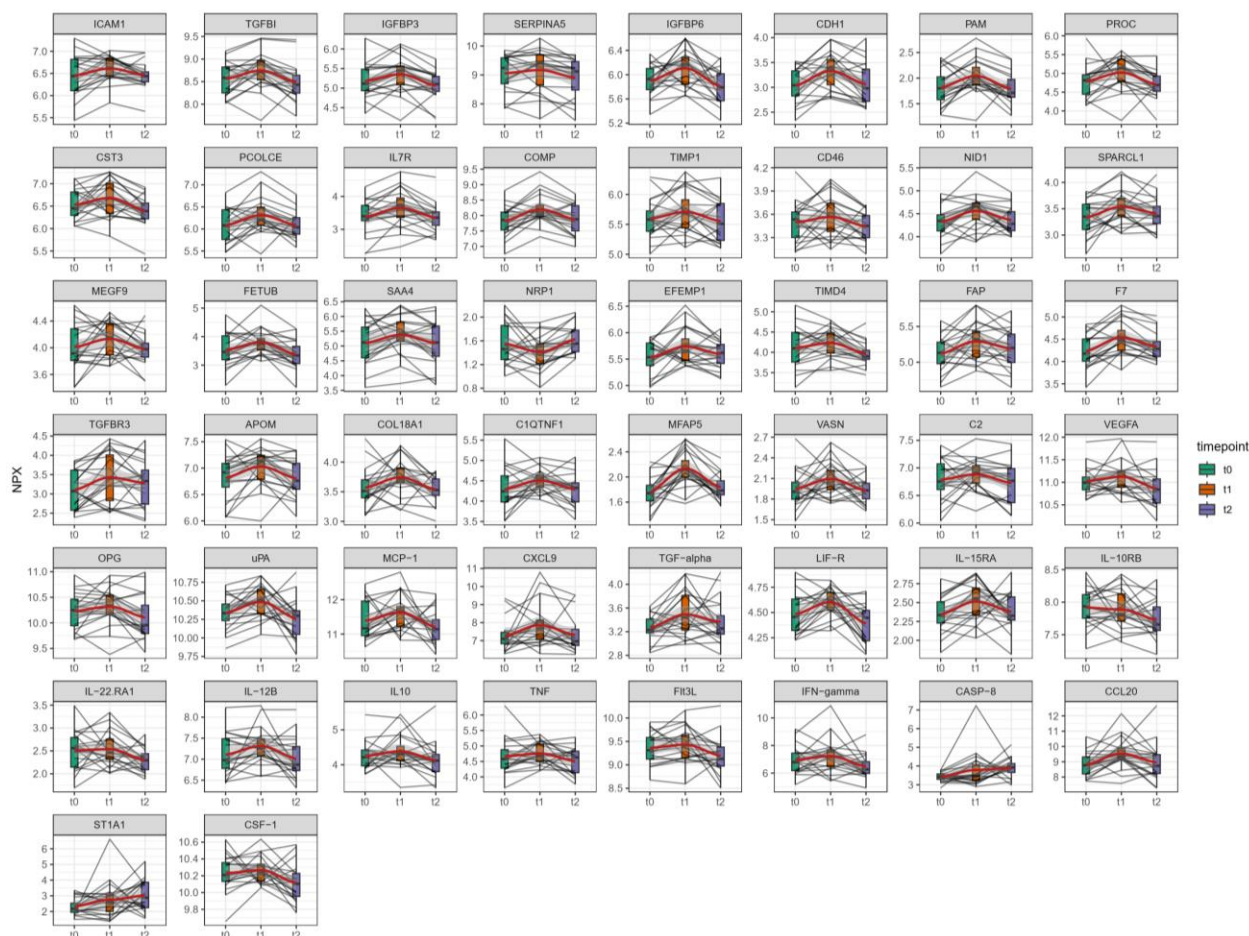

**Supplementary Figure 1. Changes in plasma proteome in Western Diet (WD) intervention group.** Targeted plasma proteomics was conducted using the inflammatory and cardiometabolic panel (Olink® Proteomics AB). Samples from N=20 individuals in the Western Diet (WD) intervention arm were obtained at baseline (t0), post-intervention (t1, week 2), and at four weeks follow-up (t2). Statistically significant differentially abundant proteins (DAPs, linear mixed model including time point, BMI, age and physical activity level as fixed variables and participant ID as a random effect with two-sided hypothesis testing, Benjamini Hochberg adjusted  $P$  value  $<0.05$ ) are presented in combined box- and line- plots with group-trend lines indicating levels of measured parameters at the 3 timepoints. Proteins levels are presented as NPX values. Presented here are the measures that are not included in the main figure.

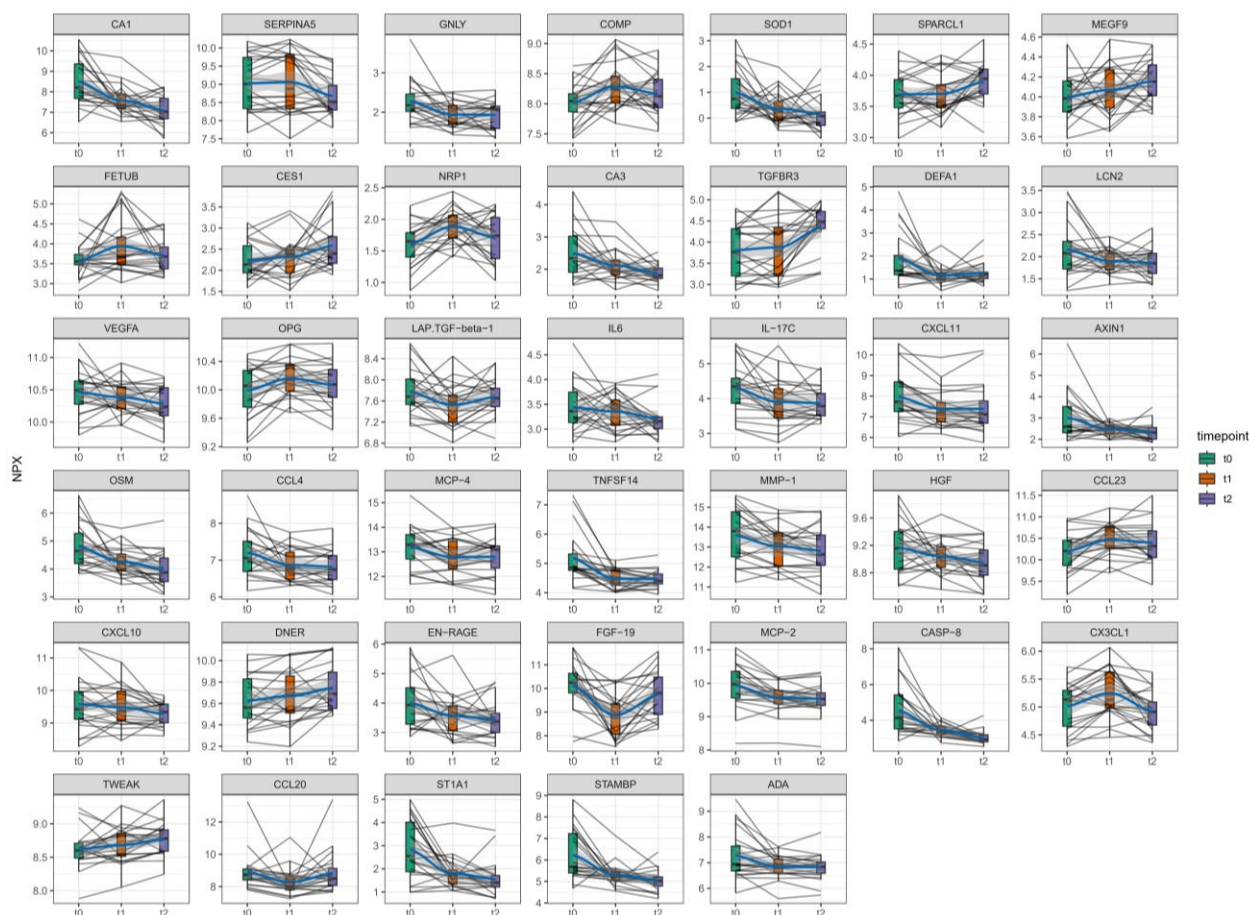

**Supplementary Figure 2. Changes in plasma proteome in switch to African heritage Diet group.** Targeted plasma proteomics was conducted using the inflammatory and cardiometabolic panel (Olink® Proteomics AB). Samples from N=22 individuals in the were obtained at baseline (t0), post-intervention (t1, week 2), and at four weeks follow-up (t2). Statistically significant differentially abundant proteins (DAPs, linear mixed model including time point, BMI, age and physical activity level as fixed variables and participant ID as a random effect with two-sided hypothesis testing, Benjamini Hochberg adjusted  $P$  value <0.05) are presented in combined box- and line-plots with group-trend lines indicating levels of measured parameters at the 3 timepoints. Proteins levels are presented as NPX values. Presented here are the measures that are not included in the main figure.

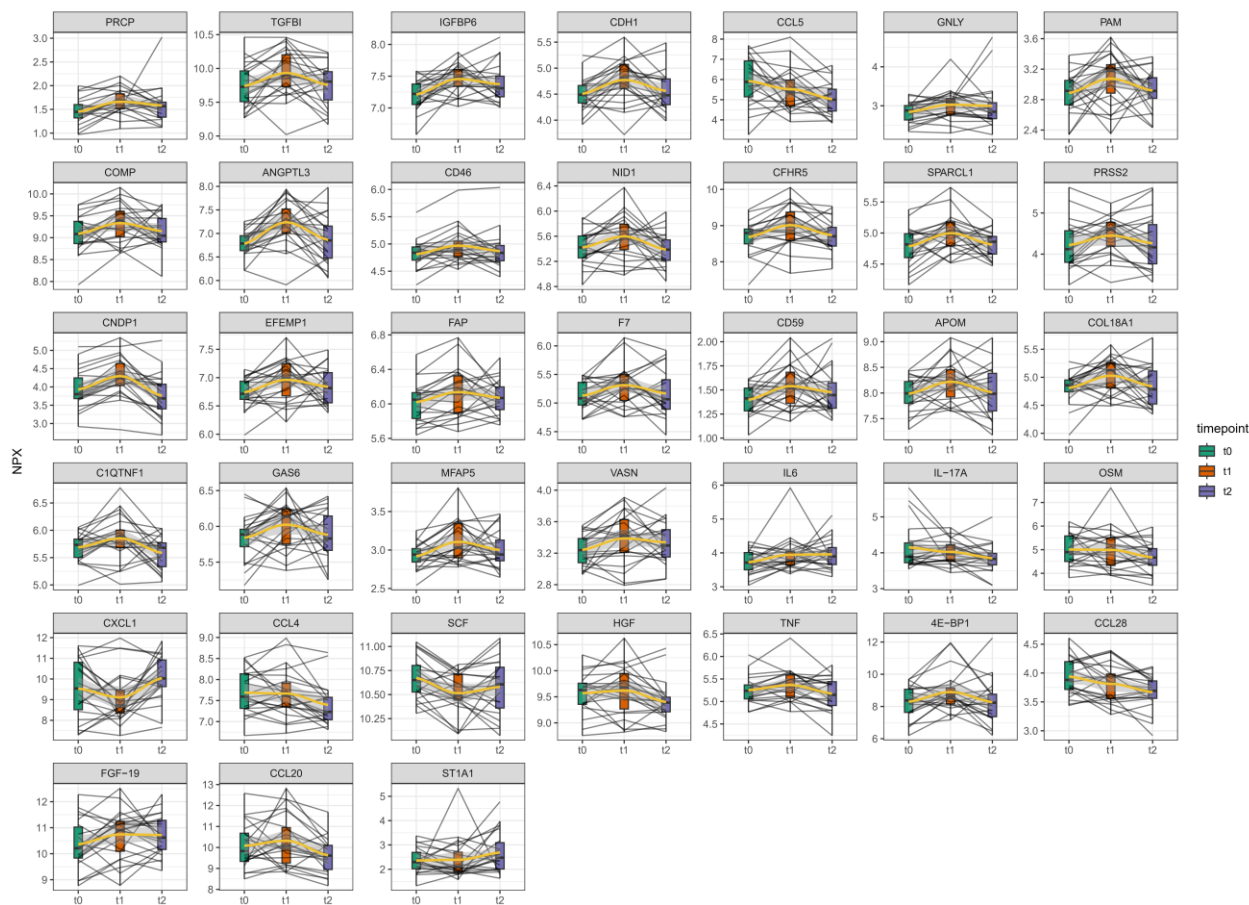

**Supplementary Figure 3. Changes in plasma proteome in fermented beverage intervention group.** Targeted plasma proteomics was conducted using the inflammatory and cardiometabolic panel (Olink® Proteomics AB). Samples from N=22 individuals in the fermented beverage intervention arm were obtained at baseline (t0), post-intervention (t1, week 1), and at four weeks follow-up (t2). Statistically significant differentially abundant proteins (DAPs, linear mixed model including time point, BMI, age and physical activity level as fixed variables and participant ID as a random effect with two-sided hypothesis testing, Benjamini Hochberg adjusted  $P$  value <0.05) are presented in combined box- and line- plots with group-trend lines indicating levels of measured parameters at the 3 timepoints. Proteins levels are presented as NPX values. Presented here are the measures that are not included in the main figure.

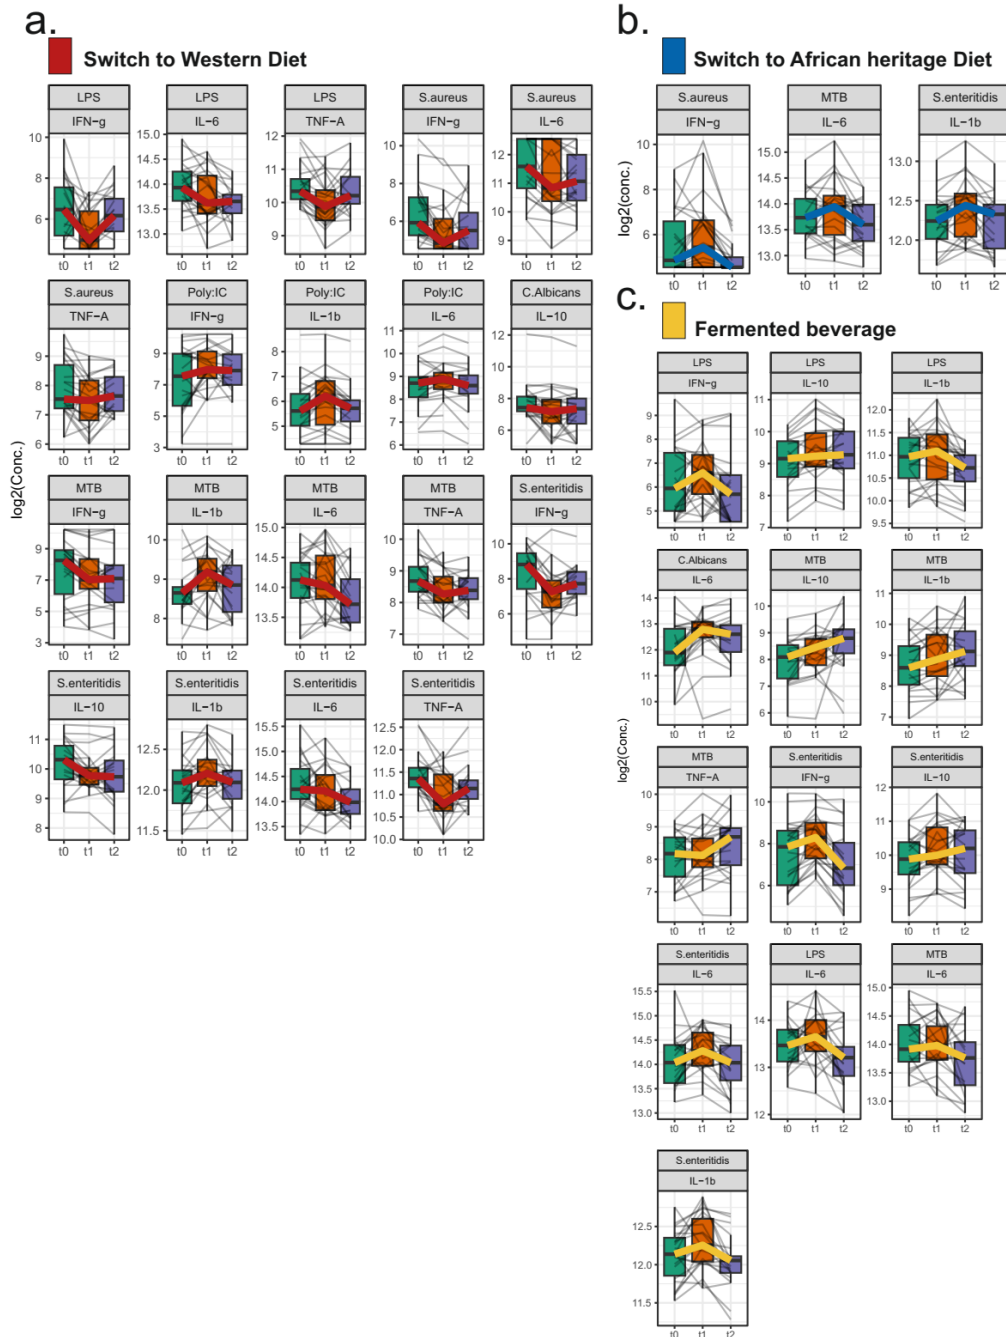

**Supplementary Figure 4. Changes in whole blood cytokine production to stimulation with various microbial pathogens.** Whole blood obtained at baseline (t0), post-intervention (t1, week 2 for the dietary intervention and one week for the fermented beverage intervention), and four weeks follow-up (t2), was subjected to *ex-vivo* stimulation for 48 hours using *Candida albicans* hyphae ( $1 \times 10^7/\text{mL}$ ), *E. coli* lipopolysaccharide (LPS;  $10 \text{ ng/mL}$ ), *Mycobacterium tuberculosis* (MTB;  $5 \mu\text{g/mL}$ ), *Salmonella enteritidis* (*S. enteritidis*;  $1 \times 10^6/\text{mL}$ ), *Staphylococcus aureus* (*S. aureus*;  $1 \times 10^6/\text{mL}$ ) and the TLR3 agonist Poly(I:C) ( $50 \mu\text{g/mL}$ ). Cytokine concentrations were determined in the supernatants of the assays done at the three timepoints for N=19, 21, 22 individuals in the switch to Western Diet (WD), Traditional Diet (TD) or fermented beverage groups. **a, b, c** - Combined box- and line- plots with group-trend line indicating levels of measured parameters at the 3 timepoints. Lines are grouped per-participant. Cytokine production is presented as  $\log_2$  concentrations of IFN- $\gamma$ , IL-10, IL-1 $\beta$ , IL-6, and TNF in the supernatant.



Differentially abundant metabolites in controls

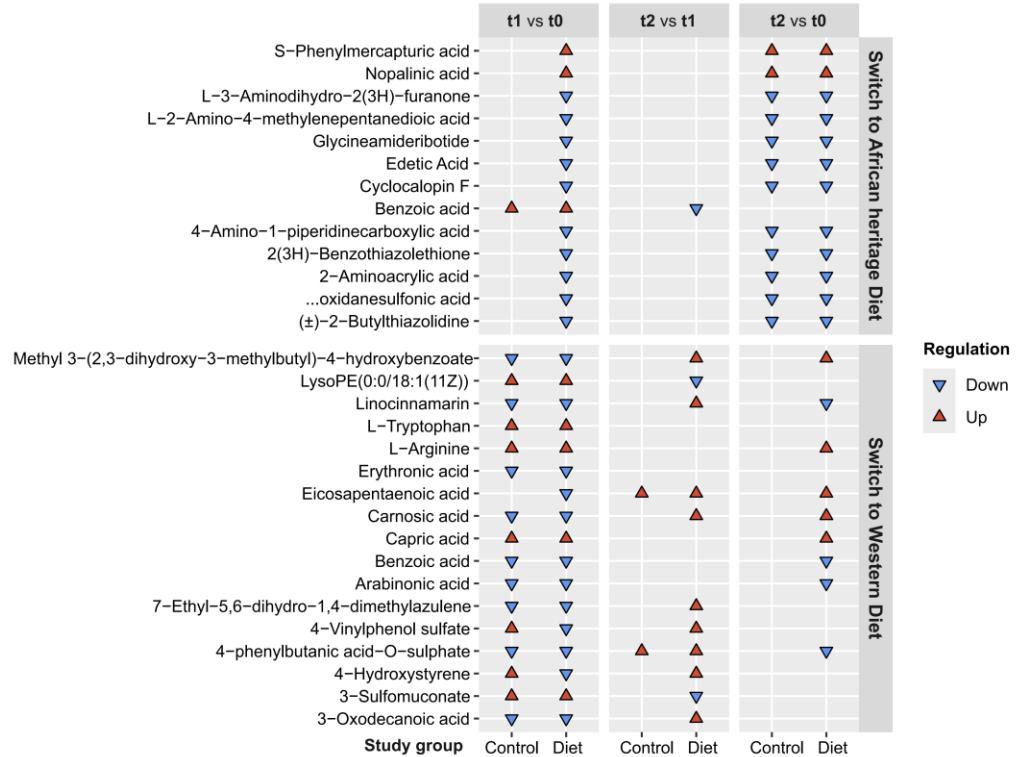

**Supplementary Figure 5. Differentially abundant metabolites (DAM) in the controls.** Triangle plot presenting the differentially abundant metabolites (DAM, y-axis) present in the controls in the switch to Western diet (lower panel) and switch to African heritage Diet (upper panel) groups (N=5 in each control group) at each time-point comparison in the control or diet study groups (x-axis). Color represents regulation direction, with upregulated metabolites in red and downregulated metabolites in blue).
